# Supplementary material for: The acute effects of adjuvant radiation and chemotherapy on peripheral blood epigenetic age in early stage breast cancer patients
Source: PubMed Central journal article supplement (PMC7293278; doi:10.1038/s41523-020-0161-3), 2020-06-12

**Supplementary Figure 1. Timeline of treatment course and study visits by treatment group.**

*Group 1: Radiotherapy alone*

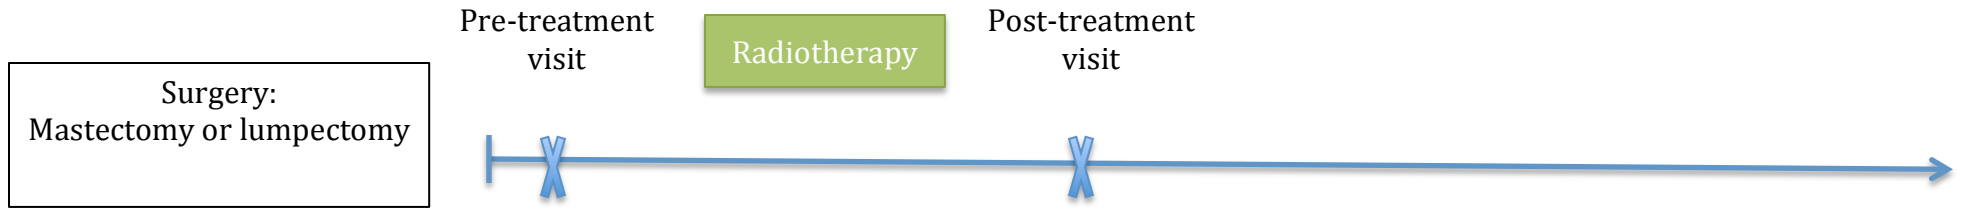

*Group 2: Chemotherapy and radiotherapy*

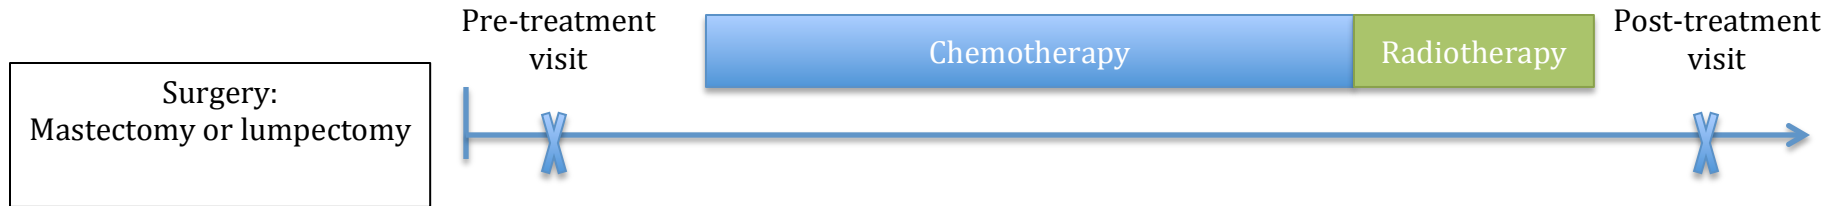

Supplementary Figure 2.

A

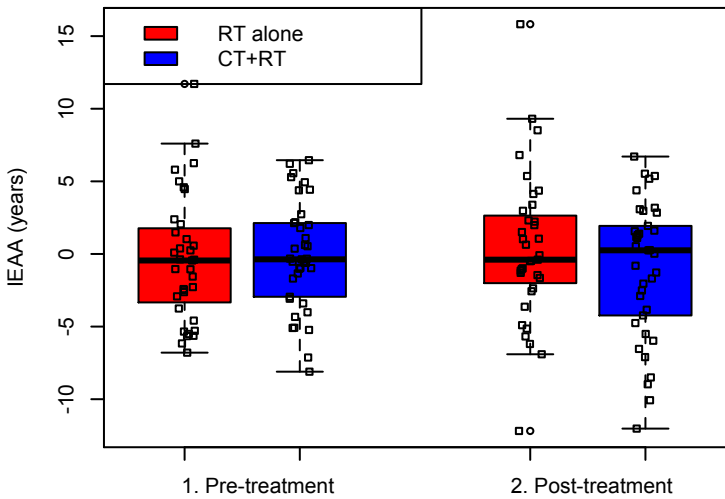

B

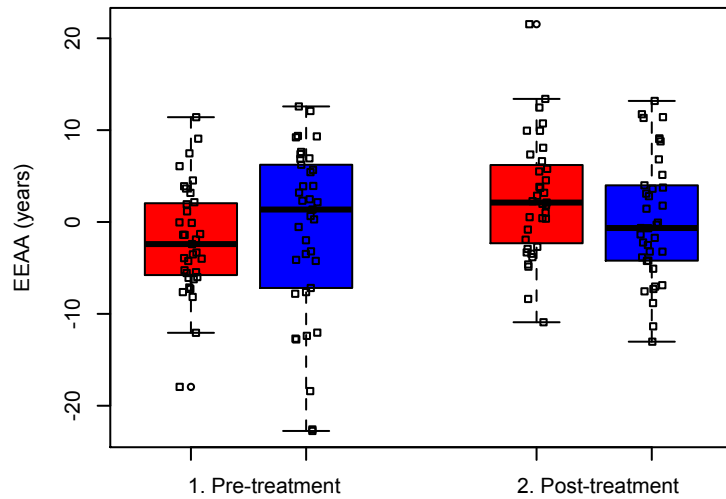

C

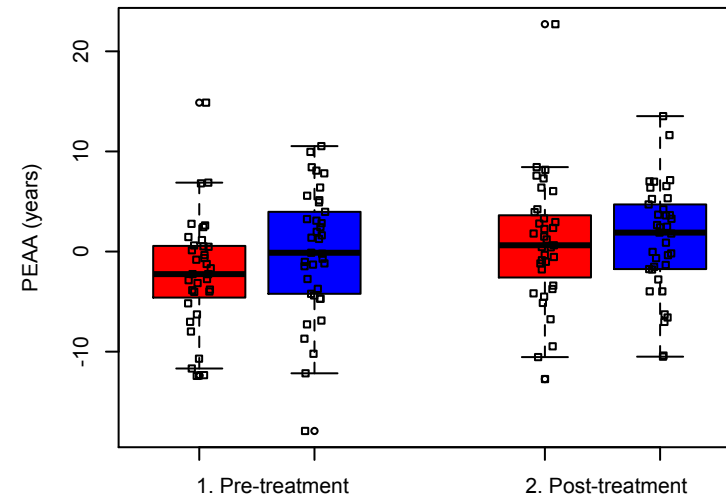

D

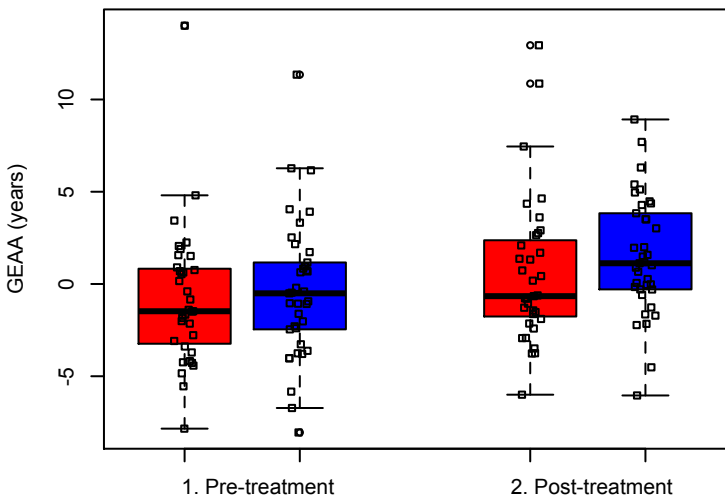

E

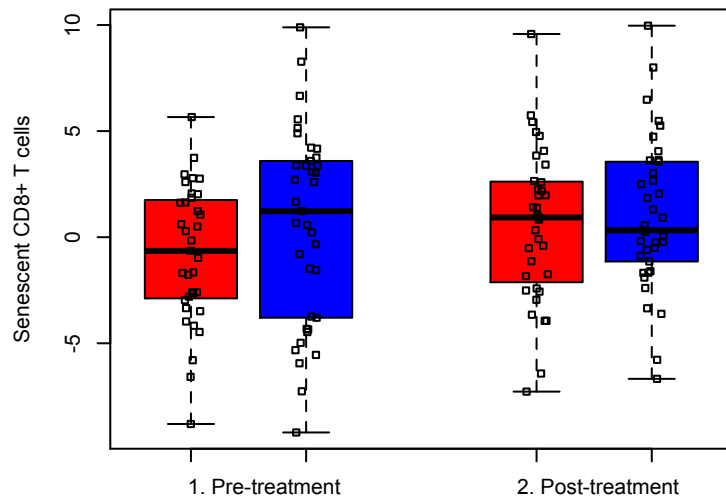

F

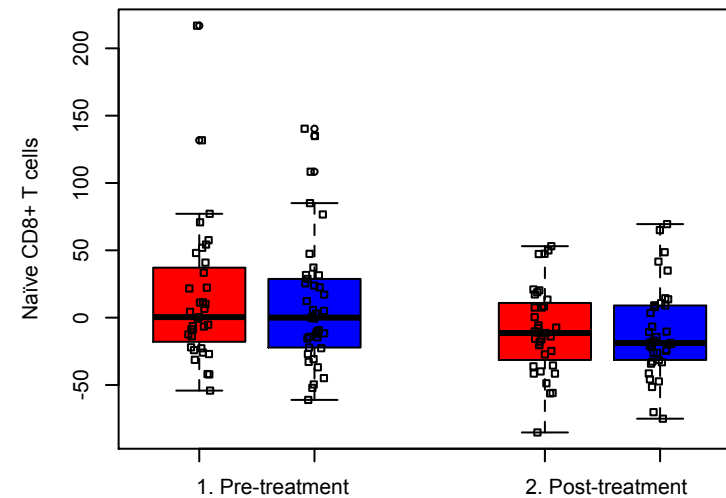

Supplement: 41523_2020_161_MOESM1_ESM.pdf [file 41523_2020_161_MOESM1_ESM.pdf]
